# Supplementary material for: TWIST1 Heterodimerization with E12 Requires Coordinated Protein Phosphorylation to Regulate Periostin Expression
Source: MDPI journal article supplement (doi:10.3390/cancers11091392), 2019-09-18

Fig.1

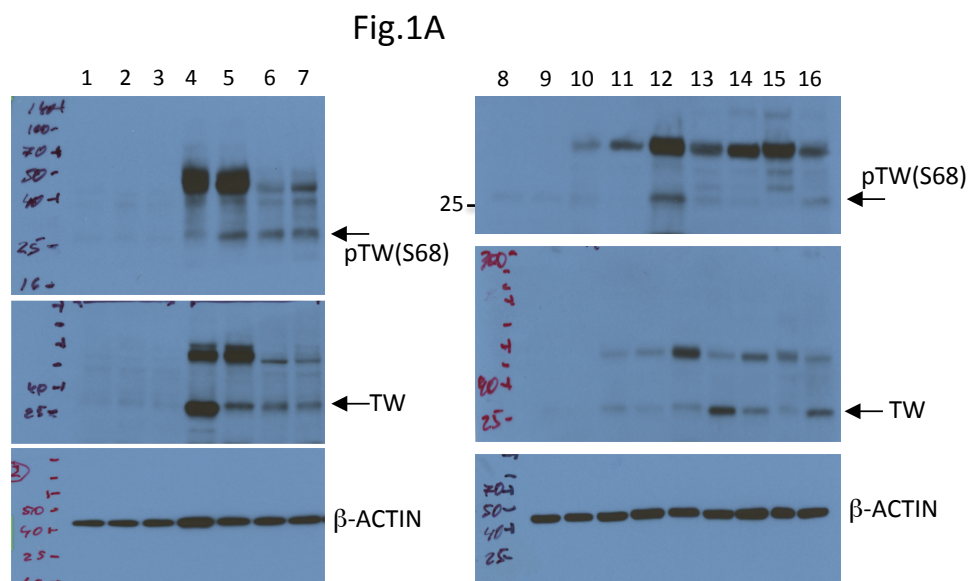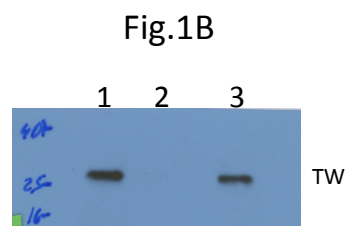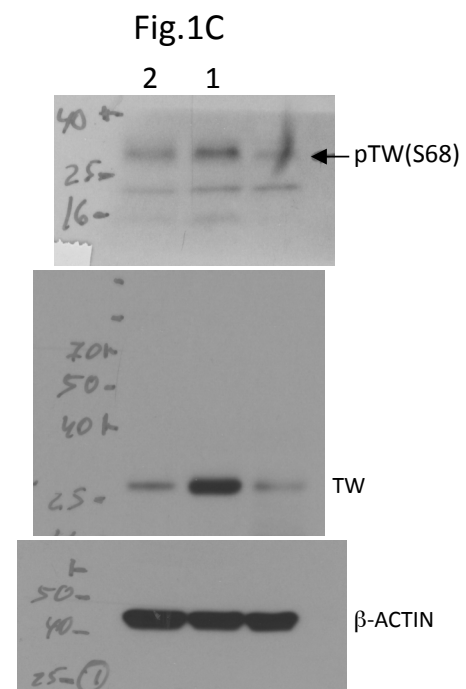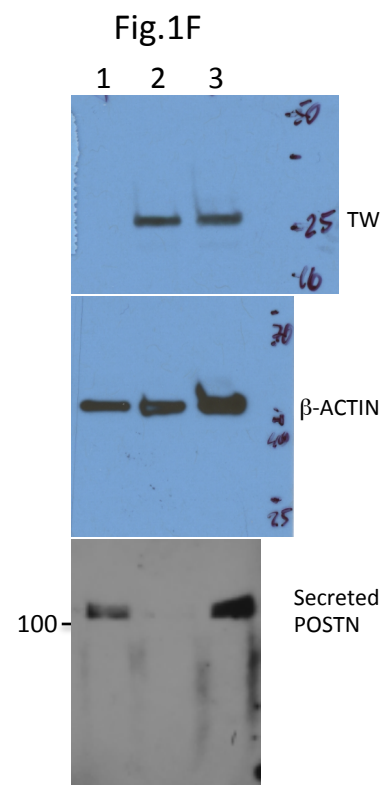

Fig.2

Fig.2A

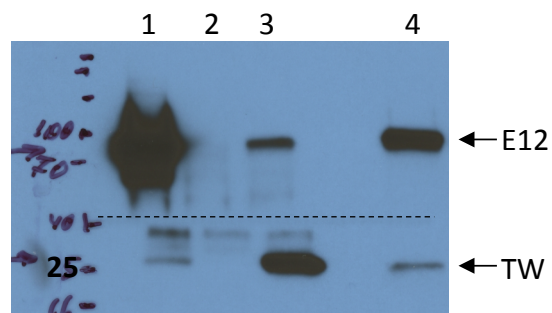

Fig.2B

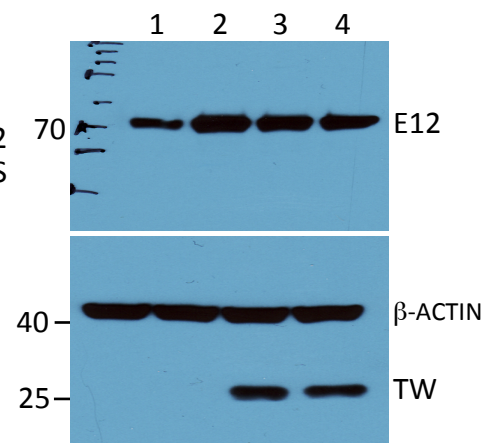

Fig.2C

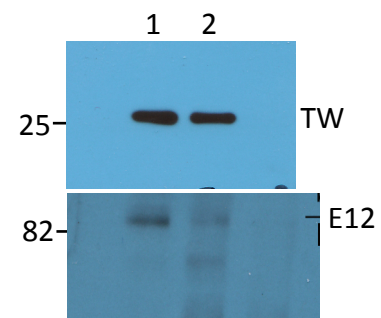

Fig.2D

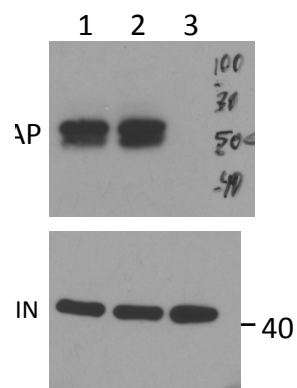

Fig.2E

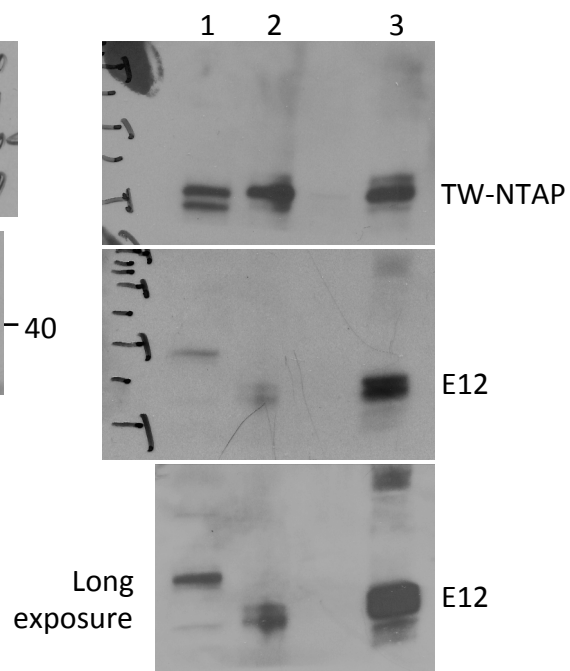

Fig.2F

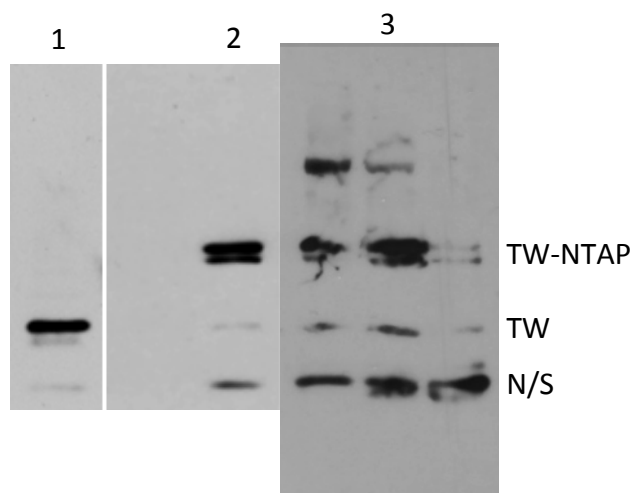

Fig.2G

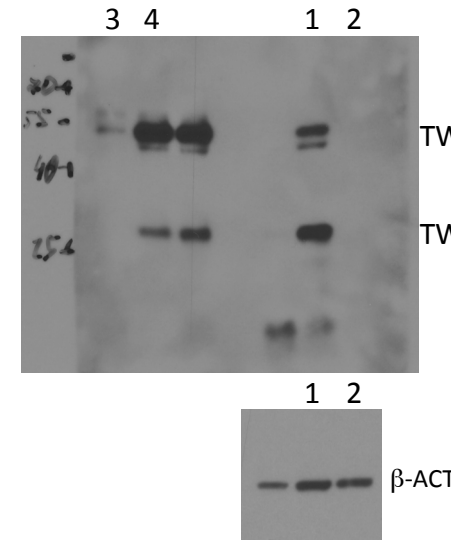

Fig.3

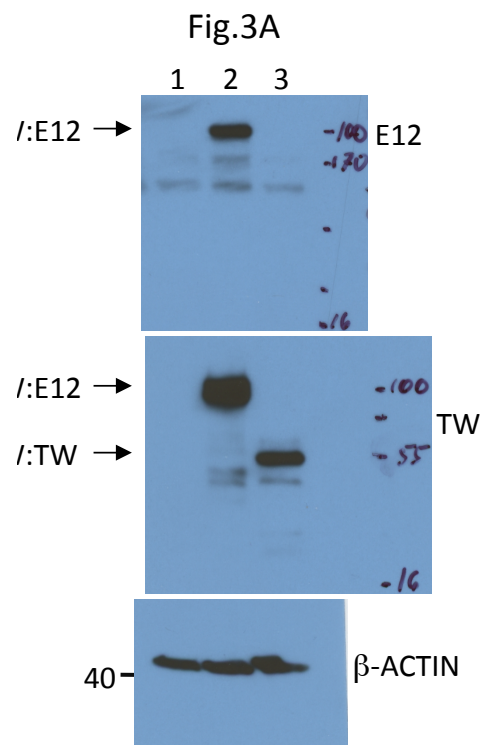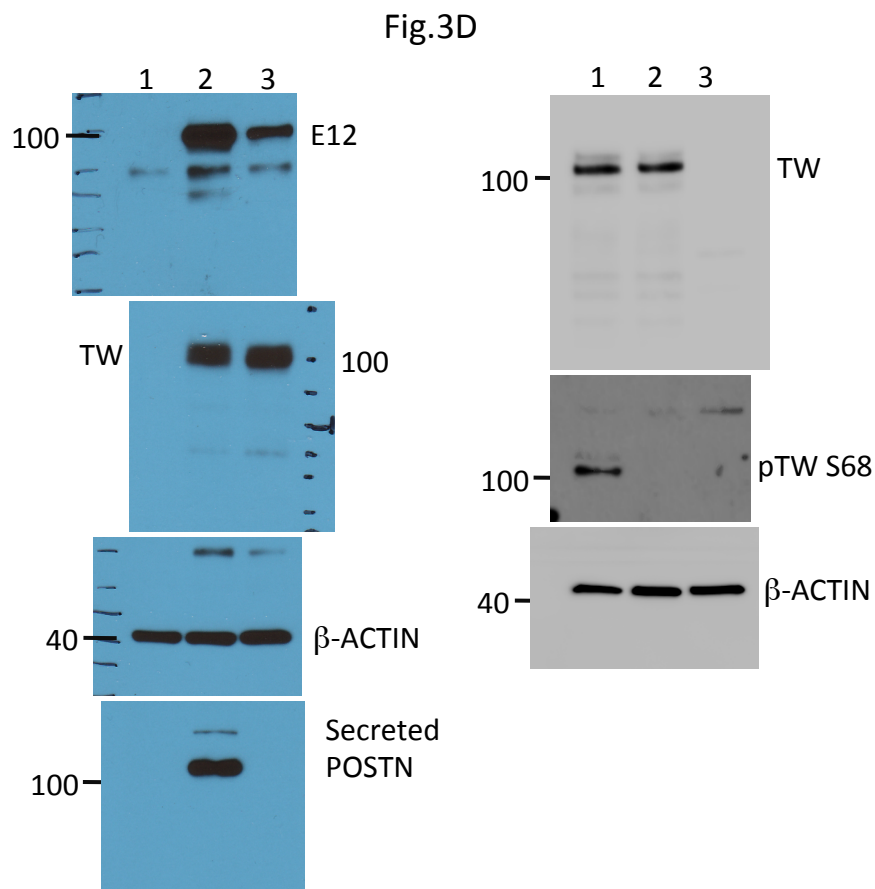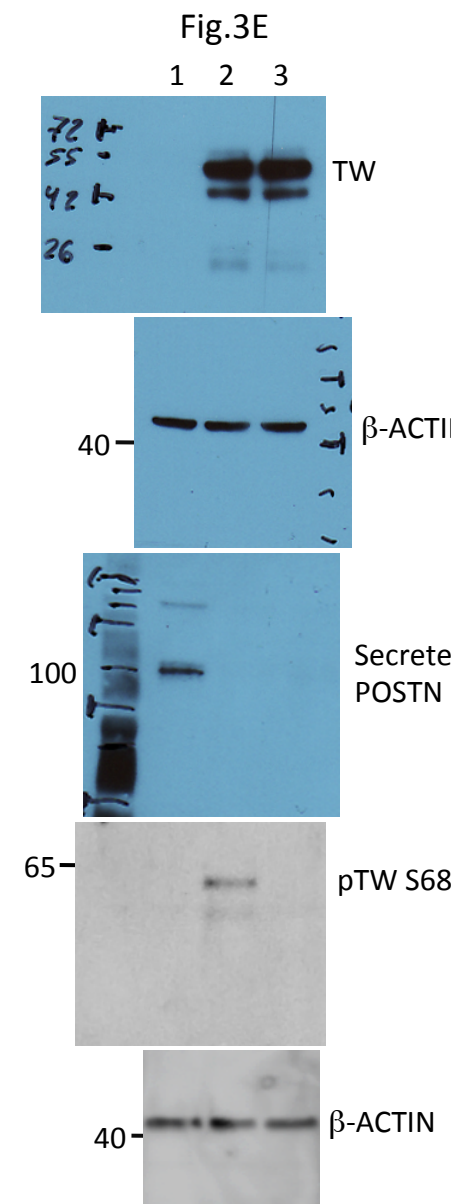

Fig.3

Fig.3F

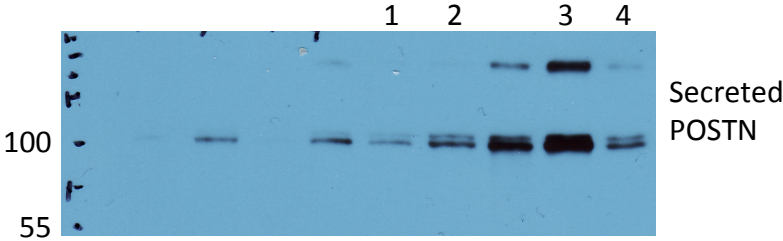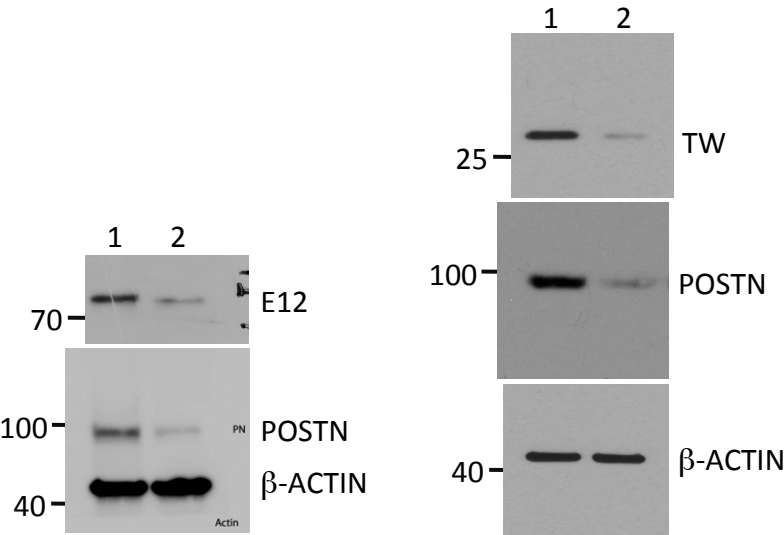



Fig.4

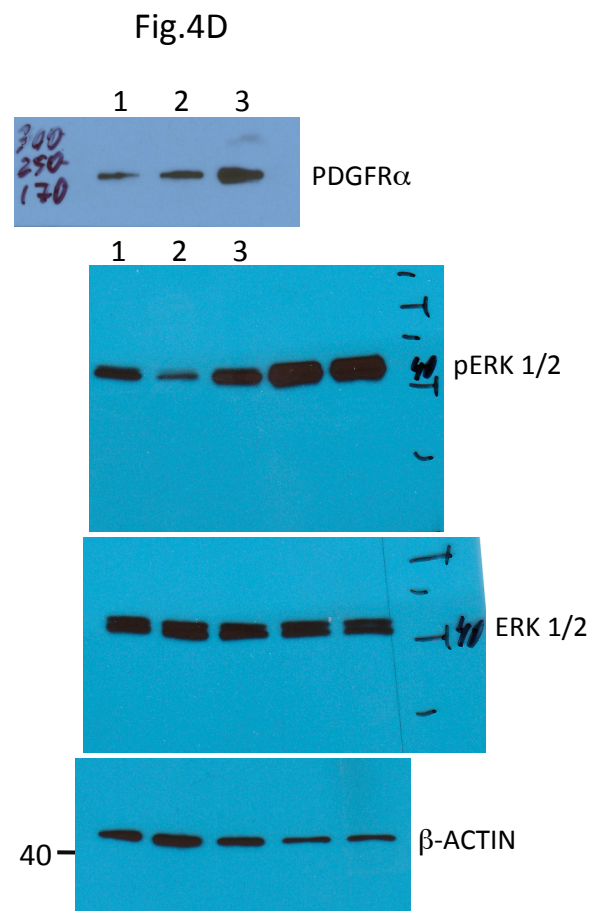

Fig.5A

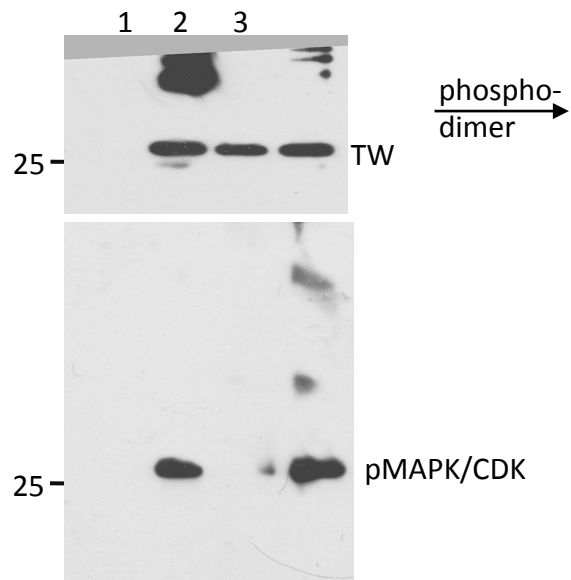

phospho-  
dimer →

Fig.5B

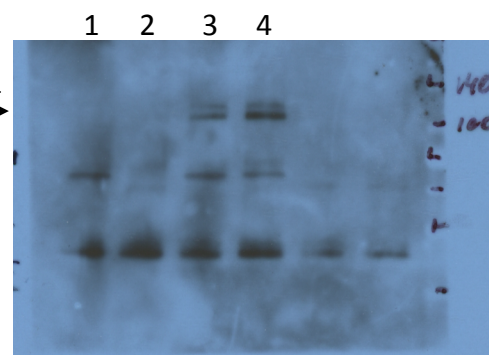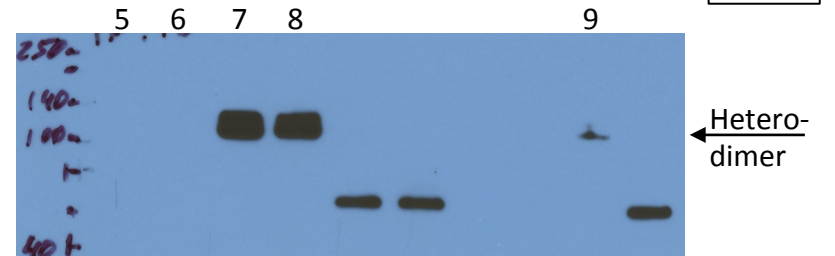

Fig.5

Fig.5C

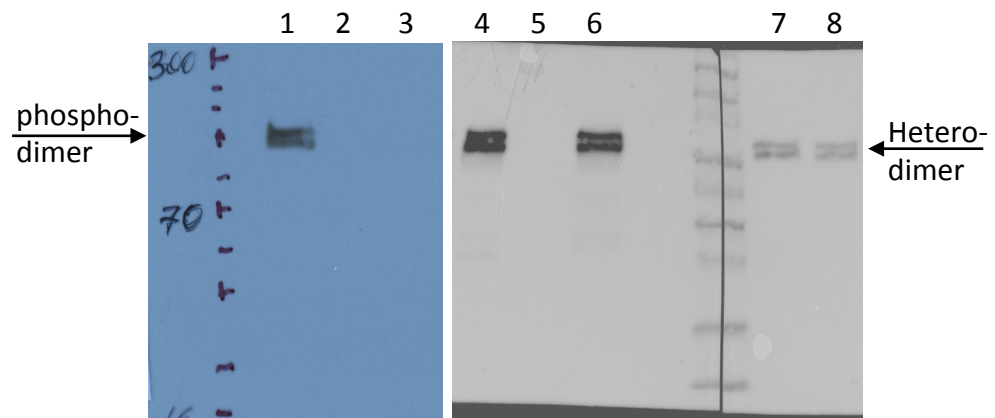

Fig.5D

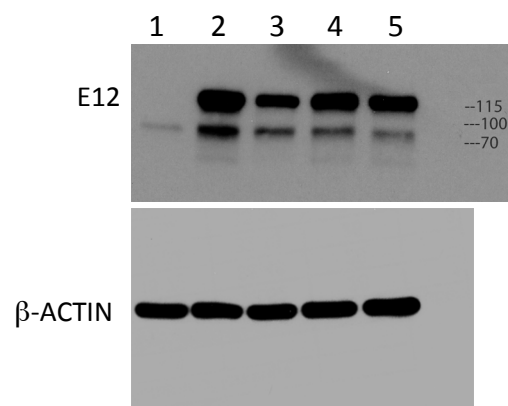

Fig.5G

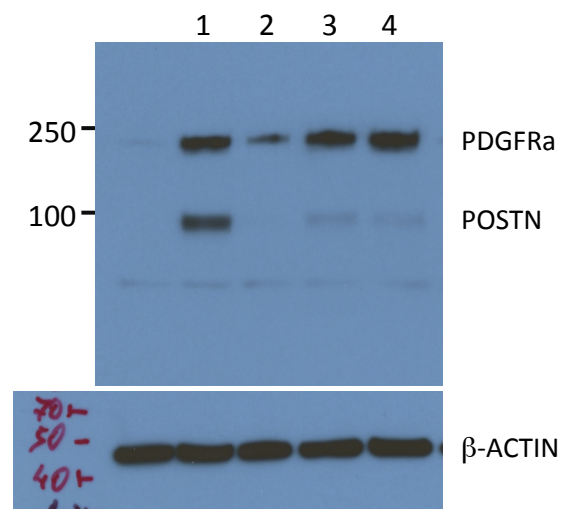

Supplement: s1 [file s1]
